# Supplementary material for: Influence of buried oxide layers of nanostructured SOI surfaces on matrix-free LDI-MS performances
Source: Royal Society of Chemistry journal article supplement (doi:10.1039/c9an02181g), 2019-12-23
Supplement: c9an02181g1.pdf [file c9an02181g1.pdf]

## Supplementary Material

### Influence of buried oxide layer of nanostructured SOI surfaces on matrix-free LDI-MS performances.

Abderrahmane Hamdi, Ioana Silvia Hosu and Yannick Coffinier\*

Univ. Lille, CNRS, Centrale Lille, ISEN, Univ. Valenciennes, IEMN, UMR CNRS 8520, Avenue Poincaré,  
BP 60069, 59652 Villeneuve d'Ascq, France.

\*Corresponding Author: Yannick Coffinier, Phone: +33 320197987; Fax: +33 (0)3.62.53.17.01; E-mail: [yannick.coffinier@univ-lille.fr](mailto:yannick.coffinier@univ-lille.fr)

**Keywords** : nanostructured SOI, metal assisted chemical etching, mass-spectrometry, laser desorption ionization, peptides.

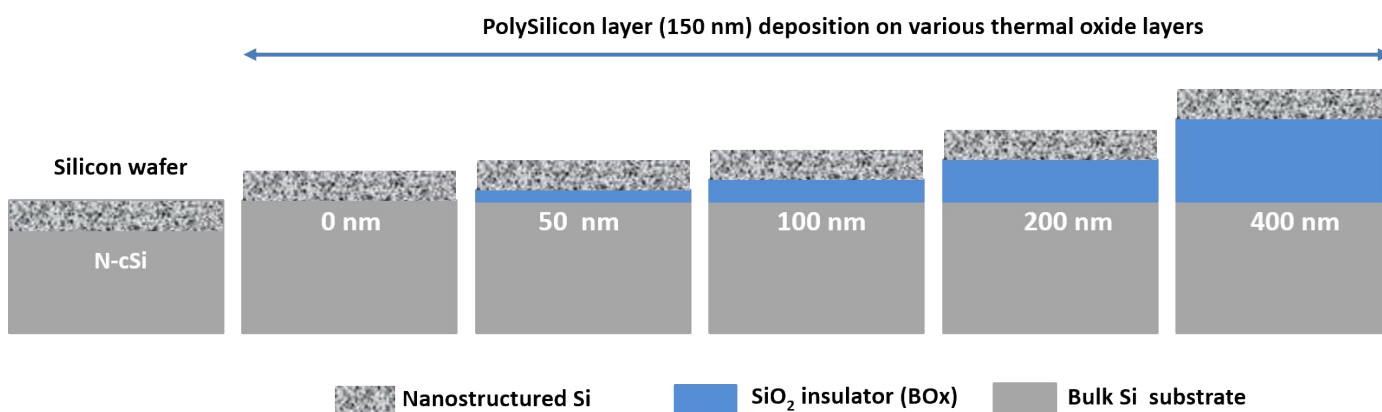

**Figure S1:** Various silicon substrates used in this study. Crystalline silicon wafer and SOI substrates with PolySi layer thickness of 150 nm deposited on various thermal oxide layers ranging from 0 to 400 nm were submitted to MACE process.

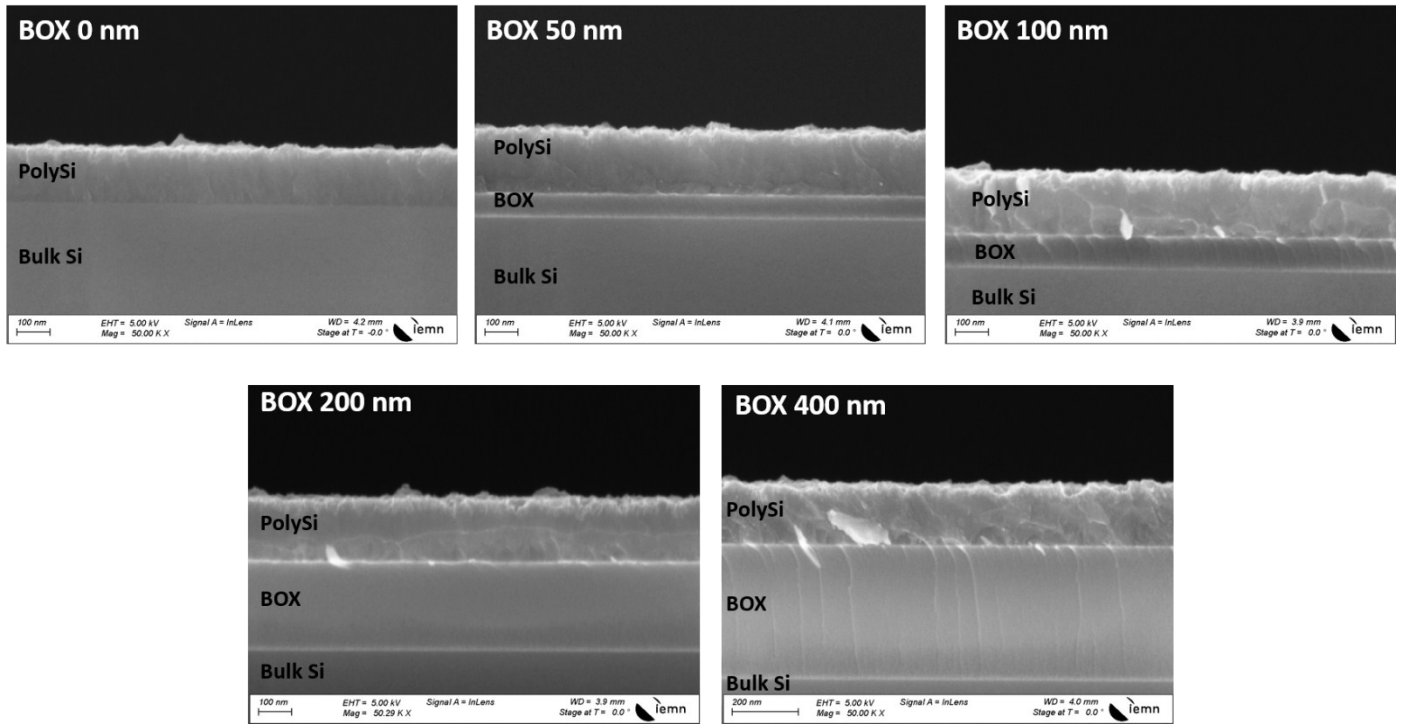

**Figure S2:** SEM images showing the influence of the etching time on the surface morphologies of SOI substrates.

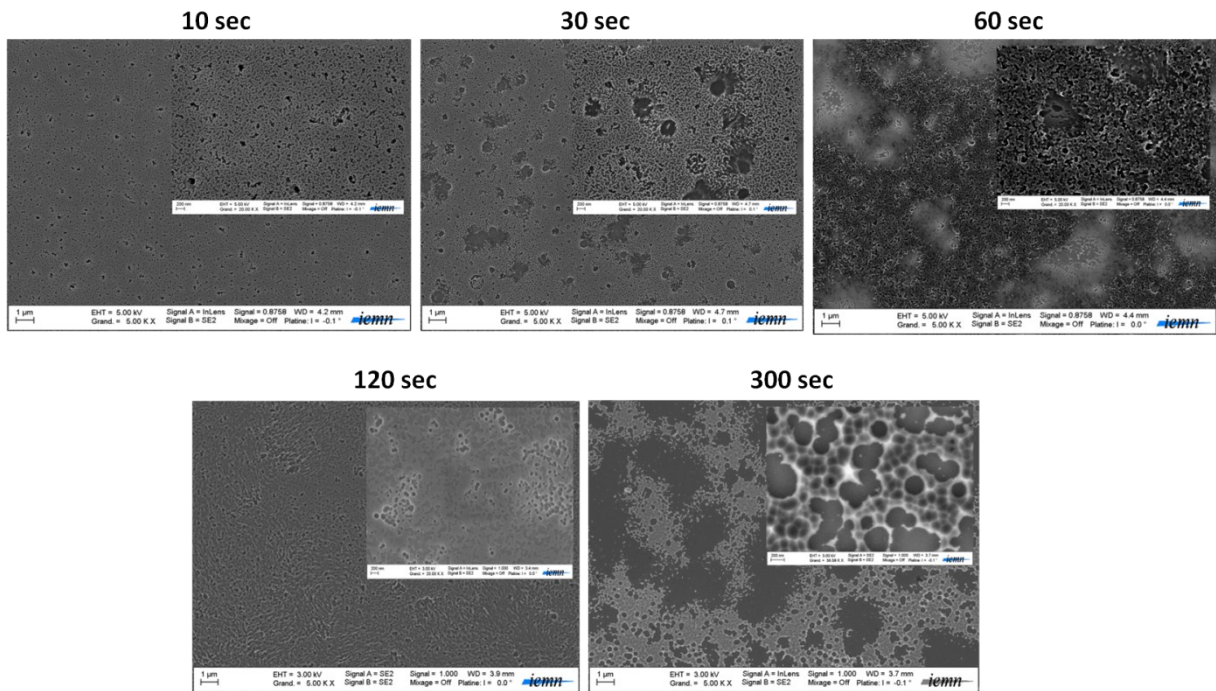

**Figure S3:** SEM images showing the influence of the etching time on the surface morphologies of SOI substrates.

## Nanostructured silicon surface

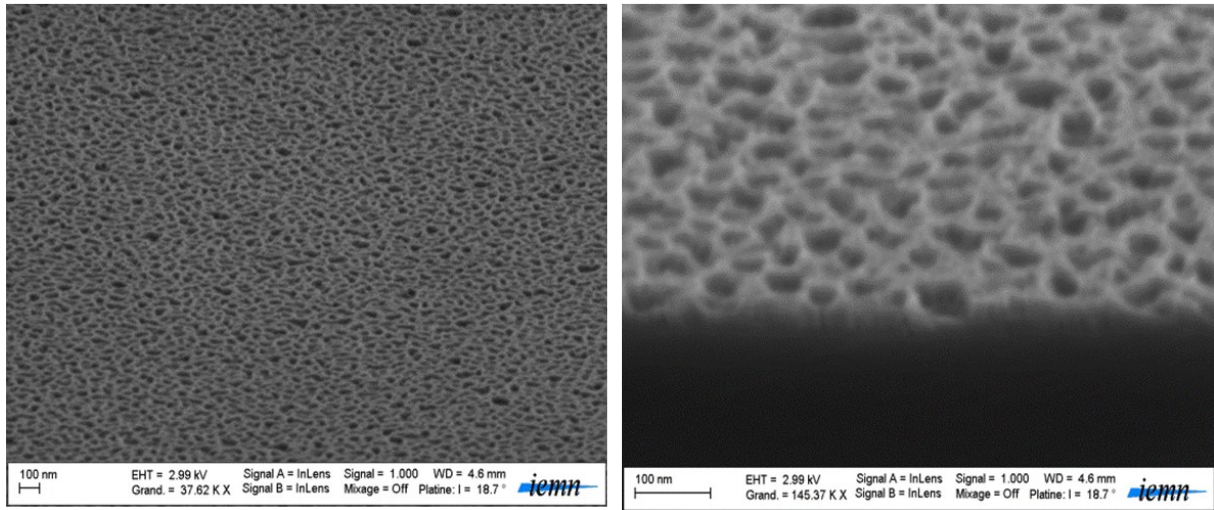

**Figure S4:** SEM images of crystalline wafer etched *via* MACE process during 10 sec as for SOI substrate.

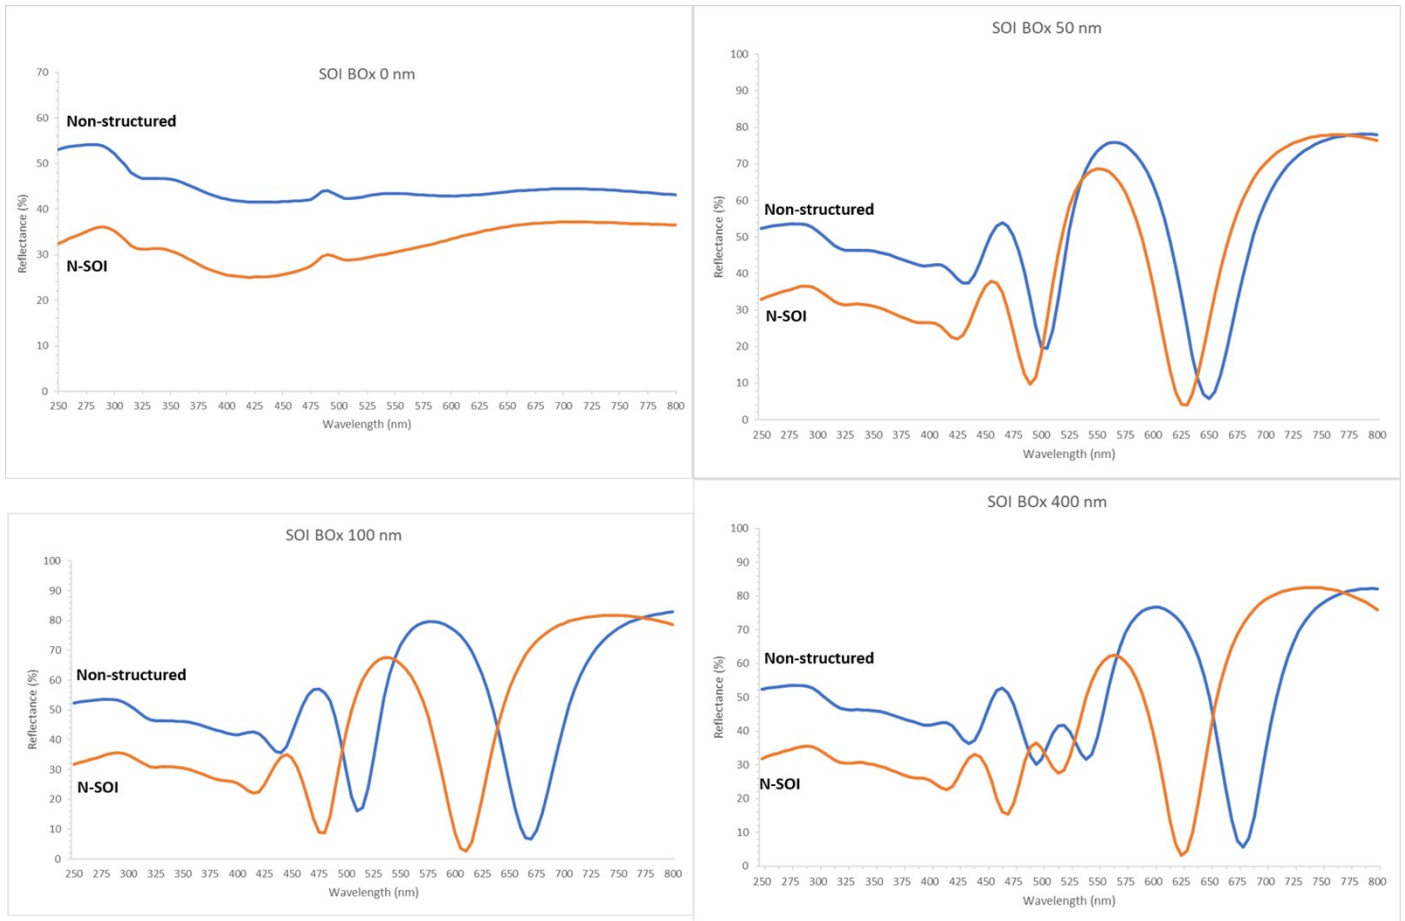

**Figure S5:** Reflectivity (R%) spectra measurements of the bare SOI and N-SOI (BOX=0, 50, 100 and 400 nm) (etching 10 sec) for wavelengths ranging from 250 to 800 nm.

| OTS terminated surfaces | Water contact angle (°) | Image of sessile droplet<br>Volume deposited 1μL                                    |
|-------------------------|-------------------------|-------------------------------------------------------------------------------------|
| SOI ref                 | 108±3                   | 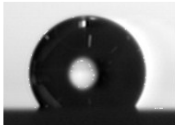 |
| N-SOI                   | 125±4                   |  |
| N-cSi                   | 123±4                   |  |

**Figure S6:** Water contact angles on OTS terminated non structured SOI surface and nanostructured SOI and crystalline Si surfaces via MACE process (10 sec etching).

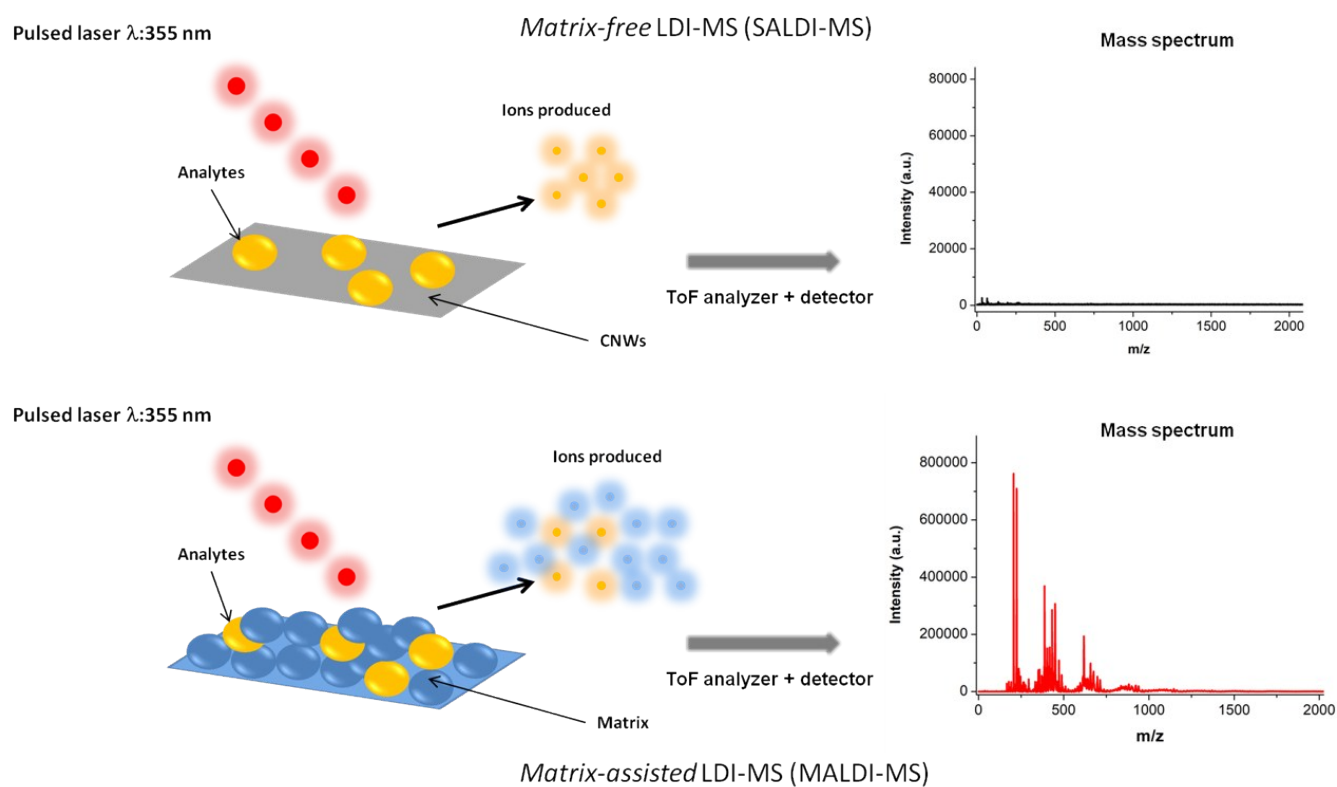

**Figure S7:** MS spectra obtained from N-SOI (Box 200nm) vs  $\alpha$ -cyano-4-hydroxycinnamic acid (CHCA).

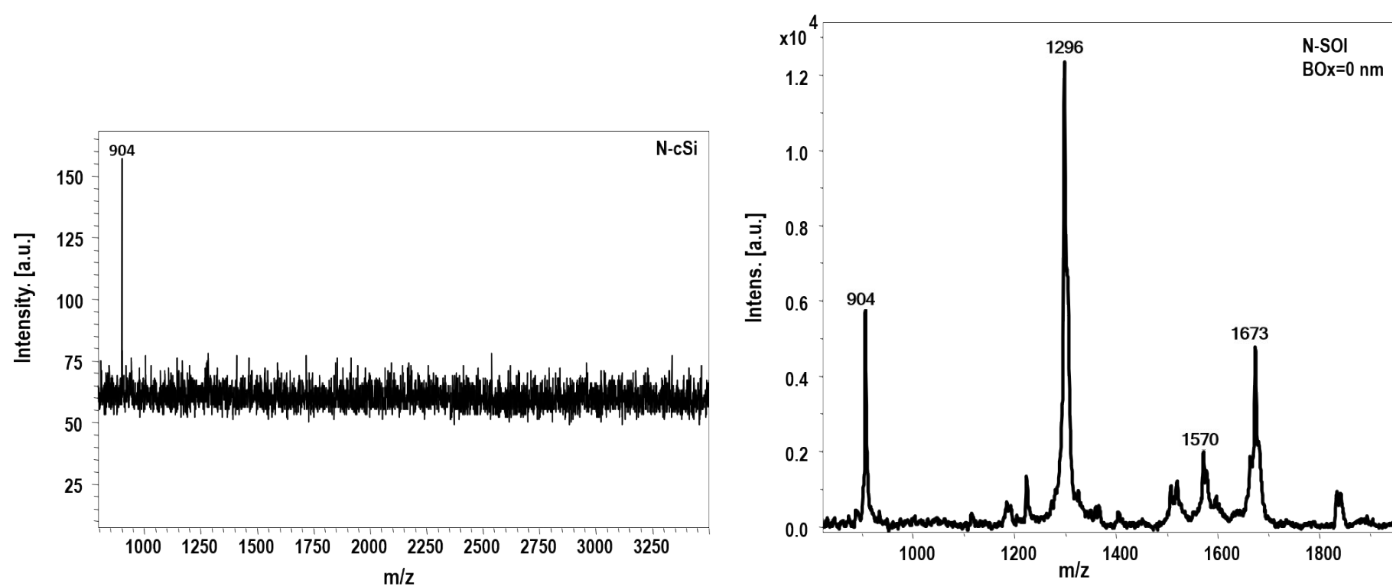

**Figure S8:** MS spectra obtained from solution containing - Des-Arg<sup>1</sup>-Bradykinin  $m/z$  904; Angiotensin I  $m/z$  1296; Neurotensin  $m/z$  1673 at 50 fmol/ $\mu$ L and Glu<sup>1</sup>-Fibrinopeptide B  $m/z$  1570 at 10 fmol/ $\mu$ L on N-cSi (left) and N-SOI (BOx=0nm) substrate.

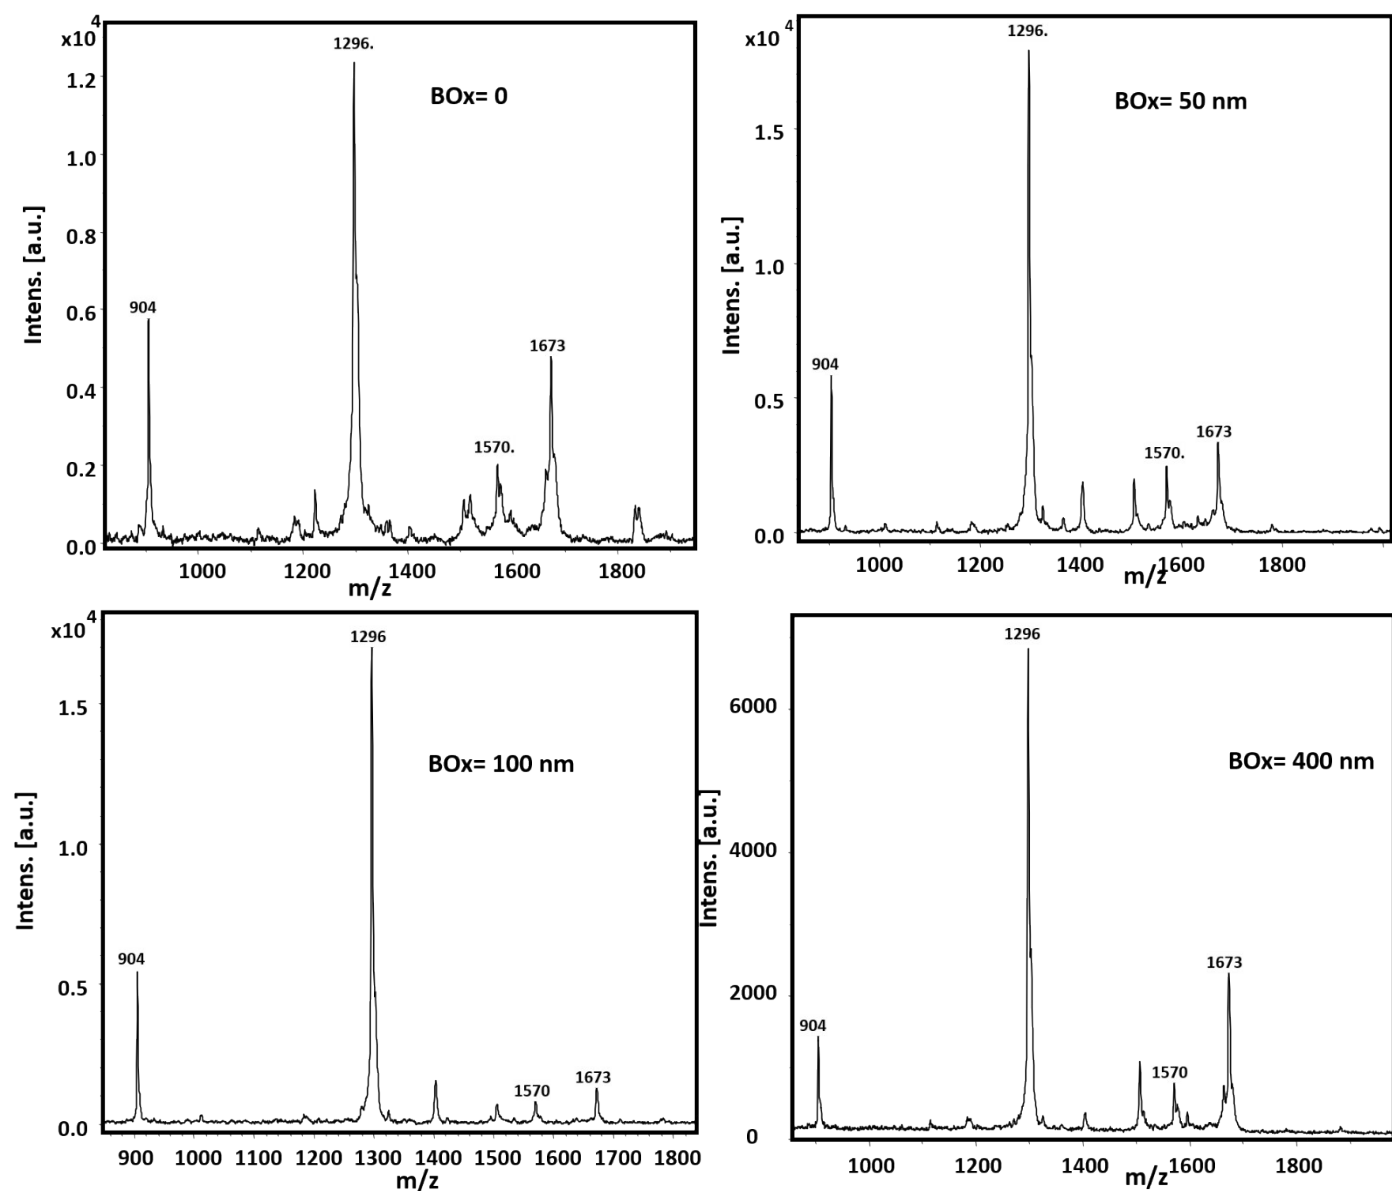

**Figure S9:** MS spectra obtained from solution containing - Des-Arg<sup>1</sup>-Bradykinin  $m/z$  904; Angiotensin I  $m/z$  1296; Neurotensin  $m/z$  1673 at 50 fmol/ $\mu$ L and Glu<sup>1</sup>-Fibrinopeptide B  $m/z$  1570 at 10 fmol/ $\mu$ L on N-SOI substrate with various Box layers: 0, 50, 100 and 400 nm.

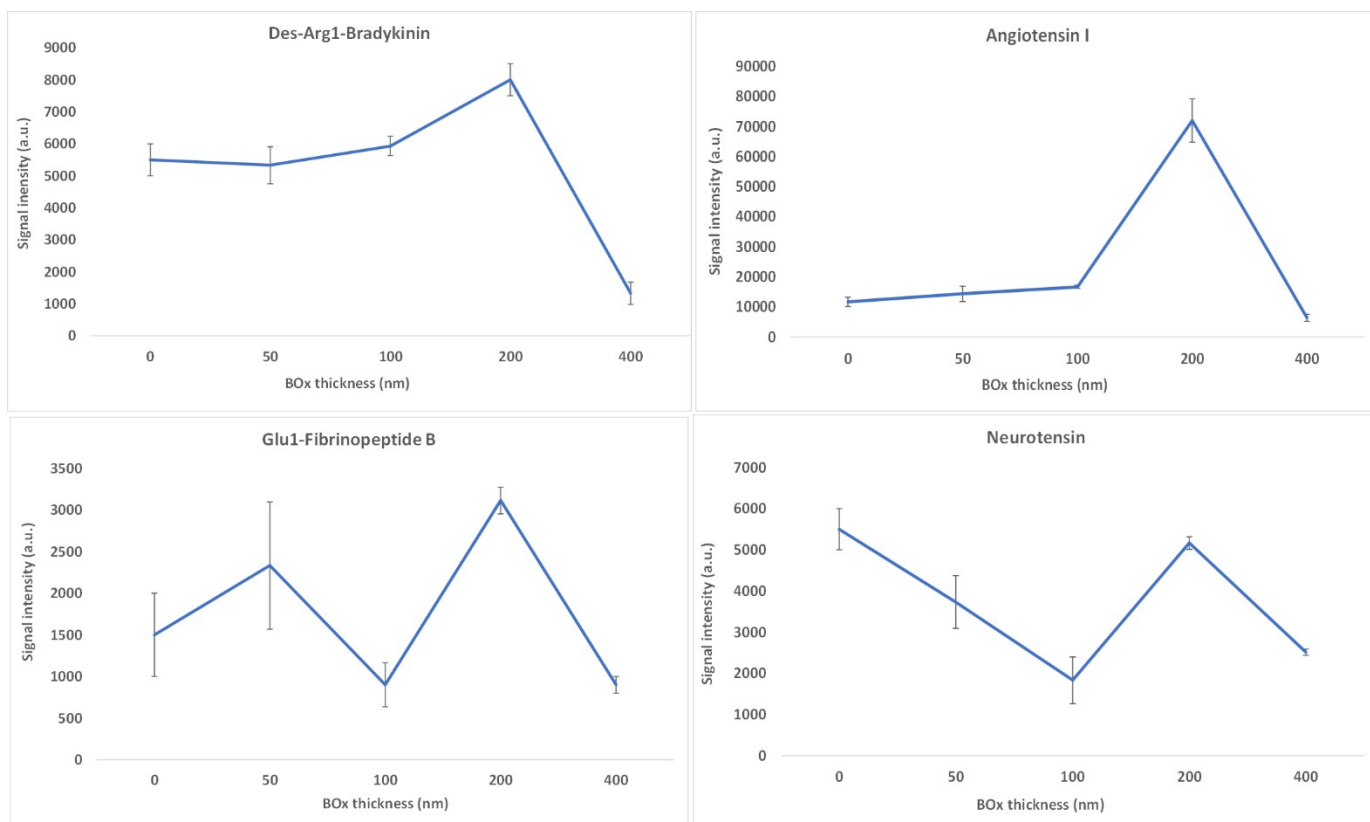

**Figure S10:** MS signal intensities obtained for peptides solution 1 from N-SOI with different BOx layer thicknesses. Signal variation have been calculated from 3 spots/surface and from 3 different surfaces. Data shown as mean  $\pm$  SD, n = 6.



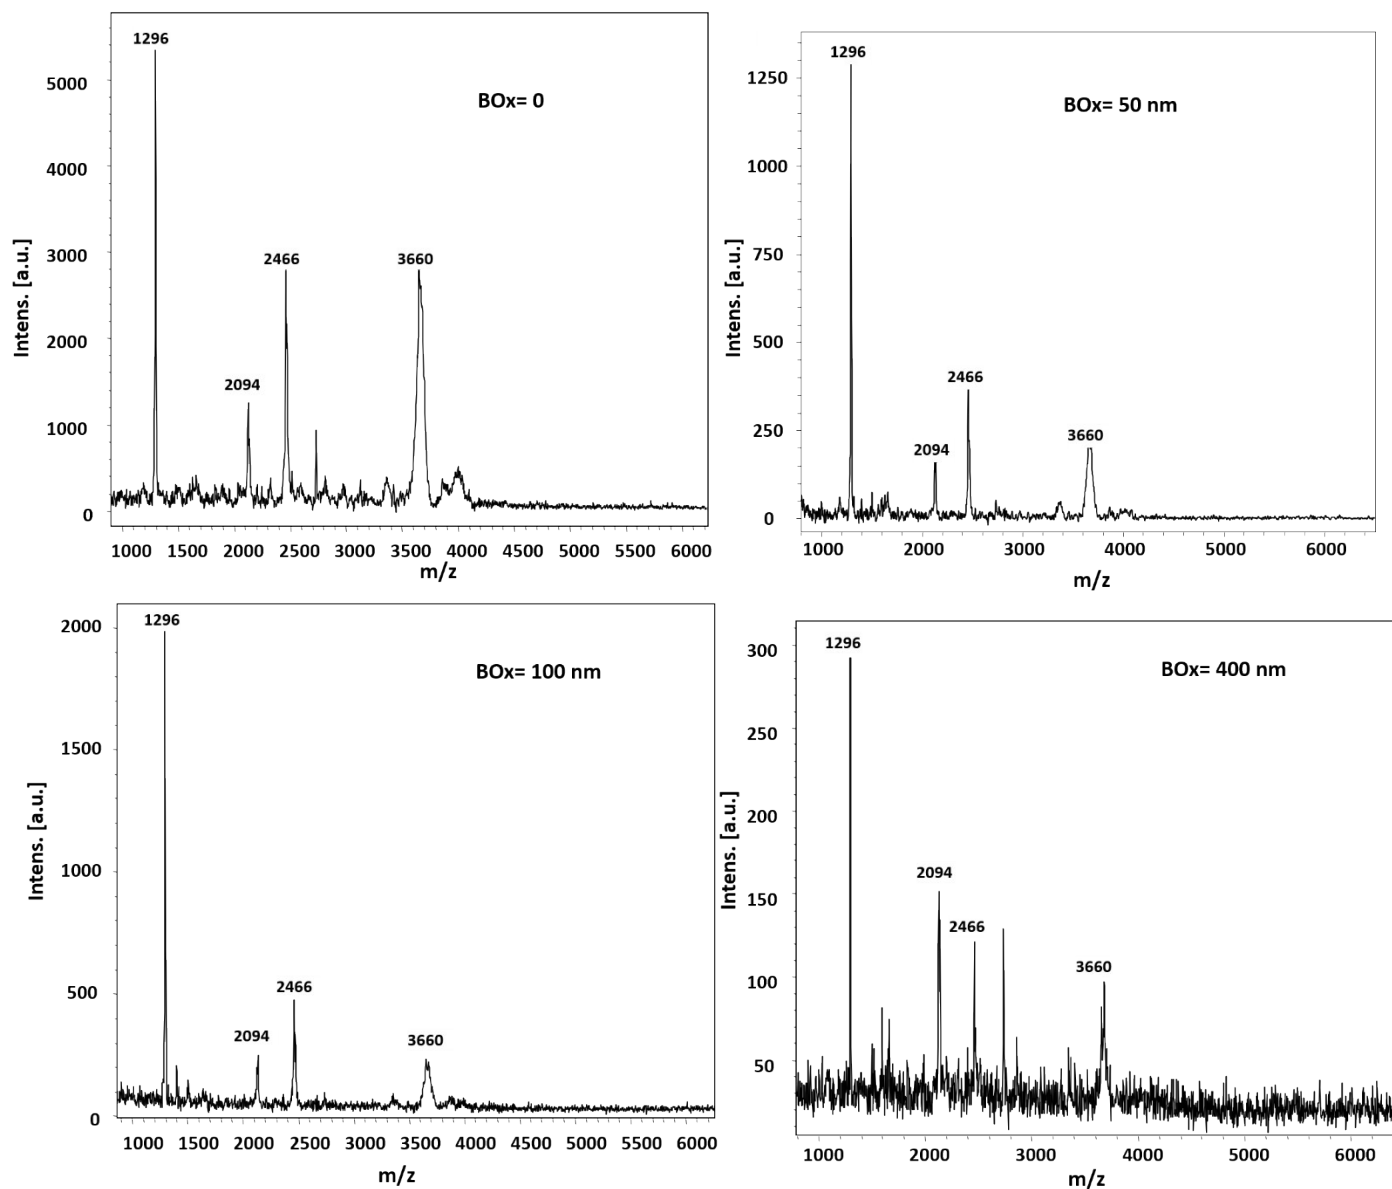

**Figure S11:** MS spectra obtained from solution containing - Angiotensin I  $m/z$  1296; ACTH (clip 1–17)  $m/z$  2094; ACTH (clip 18–39)  $m/z$  2466; ACTH (clip 7–38)  $m/z$  3660 and Insulin  $m/z$  5734 at 50 fmol/ $\mu$ L on N-SOI substrate with various BOx layers: 0, 50, 100 and 400 nm.

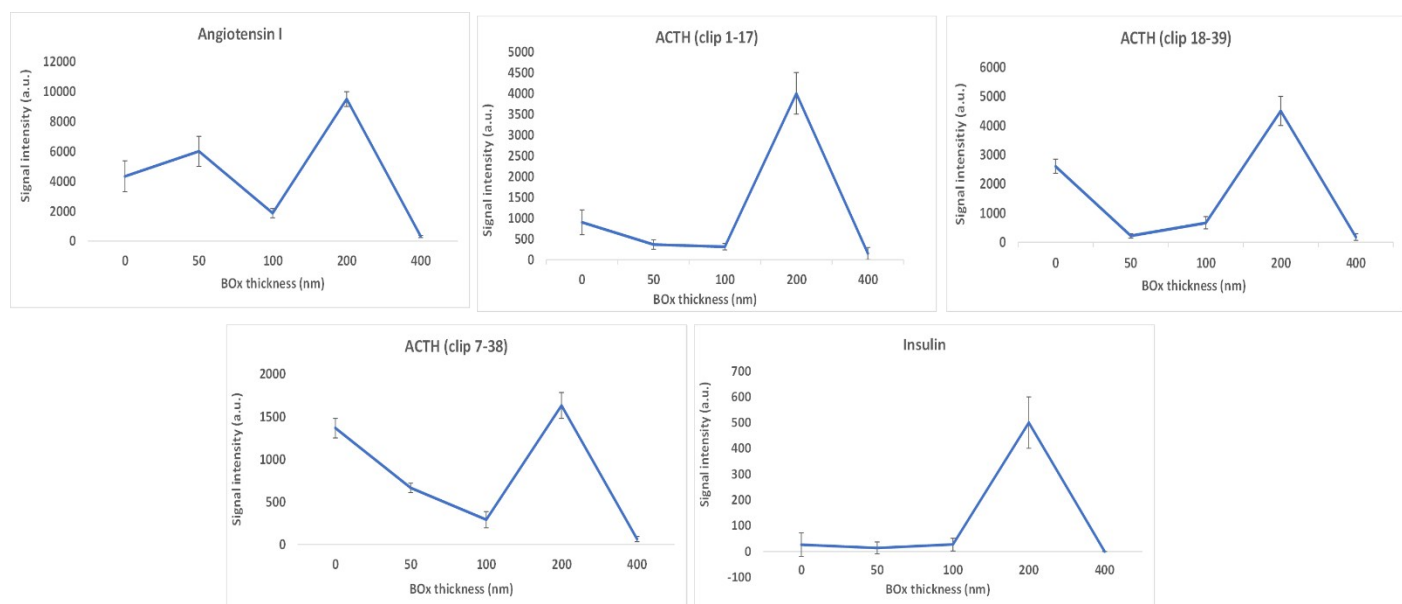



**Figure S12:** MS signal intensities obtained for peptides solution 2 from N-SOI with different BOx layer thicknesses. Signal variation have been calculated from 3 spots/surface and from 3 different surfaces. Data shown as mean  $\pm$  SD, n = 6.

**Table S1:** S/N obtained for peptides solutions 1& 2 from different N-SOI surfaces. Signal variation have been calculated from 3 spots/surface and from 3 different surfaces. Data shown as mean  $\pm$  SD, n = 6.

Table S1 : Signal to noise ratios obtained from peptides solutions 1 & 2 on different N-SOI surfaces.  
Signal variation have been calculated from 3 spots/surface and from 3 different surfaces. Data shown as mean  $\pm$  SD, n = 6.

| Box thickness (nm) | 904      | 1296       | 1570     | 1673     |
|--------------------|----------|------------|----------|----------|
| 0                  | 29 (9%)  | 64 (13%)   | 15 (33%) | 11 (9%)  |
| 50                 | 69 (11%) | 122 (17%)  | 35 (32%) | 58 (17%) |
| 100                | 50 (5%)  | 172 (3,5%) | 10 (29%) | 13 (31%) |
| 200                | 70 (6%)  | 642 (10%)  | 20 (5%)  | 54 (3%)  |
| 400                | 9 (26%)  | 161 (18%)  | 3 (11%)  | 24 (3%)  |

  

| Box thickness (nm) | 1296       | 2094       | 2466     | 3660      | 5734     |
|--------------------|------------|------------|----------|-----------|----------|
| 0                  | 21 (24%)   | 12 (33%)   | 7 (9,5%) | 10 (8,5%) | -        |
| 50                 | 94 (16,5%) | 3 (31%)    | 7 (35%)  | 8 (8,5%)  | -        |
| 100                | 21 (17%)   | 3 (24%)    | 6 (31%)  | 4 (32%)   | -        |
| 200                | 121 (5%)   | 60 (12,5%) | 52 (11%) | 27 (9%)   | 10 (20%) |
| 400                | 19 (24%)   | 5 (30%)    | 5 (62%)  | 3 (45%)   | -        |

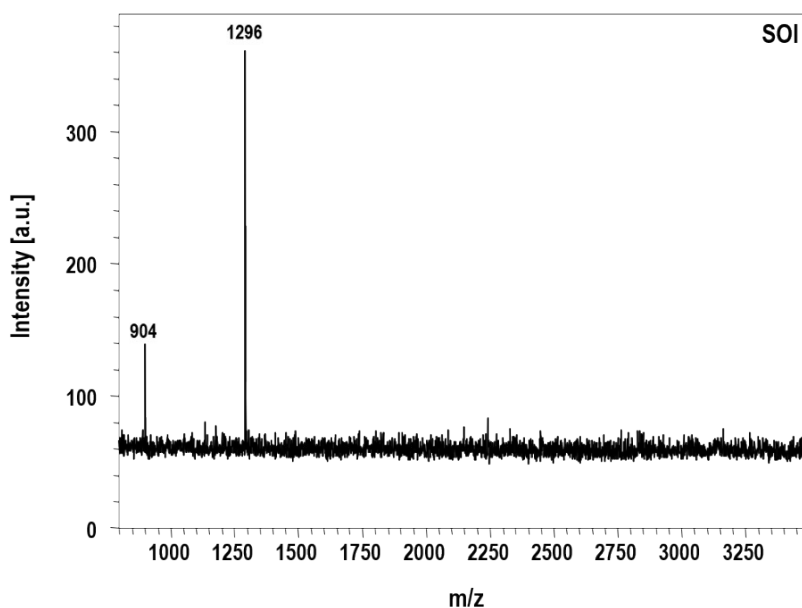

**Figure S13:** MS spectrum obtained from solution containing - Des-Arg<sup>1</sup>-Bradykinin m/z 904; Angiotensin I m/z 1296; Neurotensin m/z 1673 at 50 fmol/ $\mu$ L and Glu<sup>1</sup>-Fibrinopeptide B m/z 1570 at 10 fmol/ $\mu$ L on SOI (BOx=200 nm) substrate.

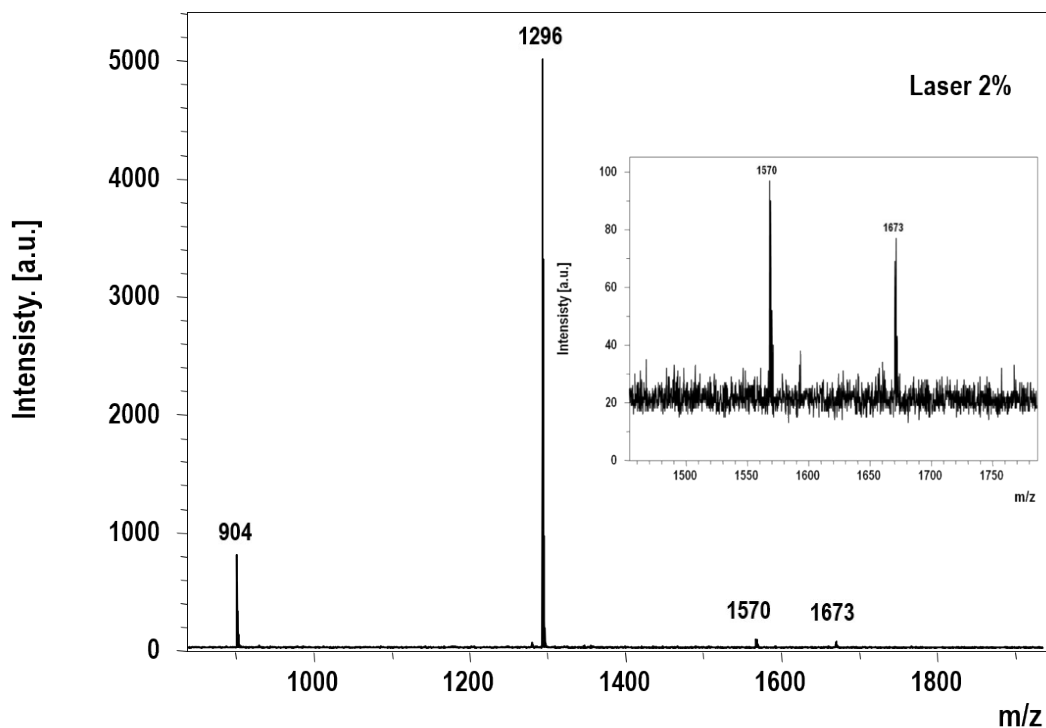

**Figure S14:** MS spectrum obtained from peptide solution 1 containing - Des-Arg1-Bradykinin  $m/z$  904; Angiotensin I  $m/z$  1296; Neurotensin  $m/z$  1673 at 50 fmol/ $\mu$ L and Glu1-Fibrinopeptide B  $m/z$  1570 at 10 fmol/ $\mu$ L on N-SOI (BOx=200 nm) substrate at low laser fluence.

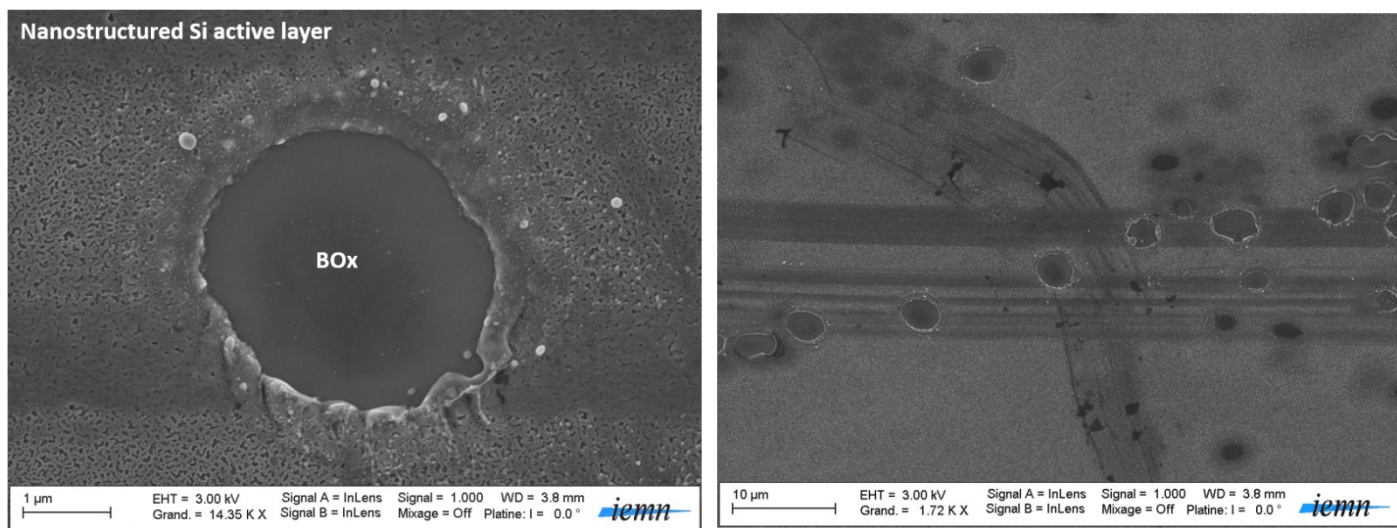

**Figure S15:** SEM images showing craters after high laser fluence impacts on N-SOI surface.

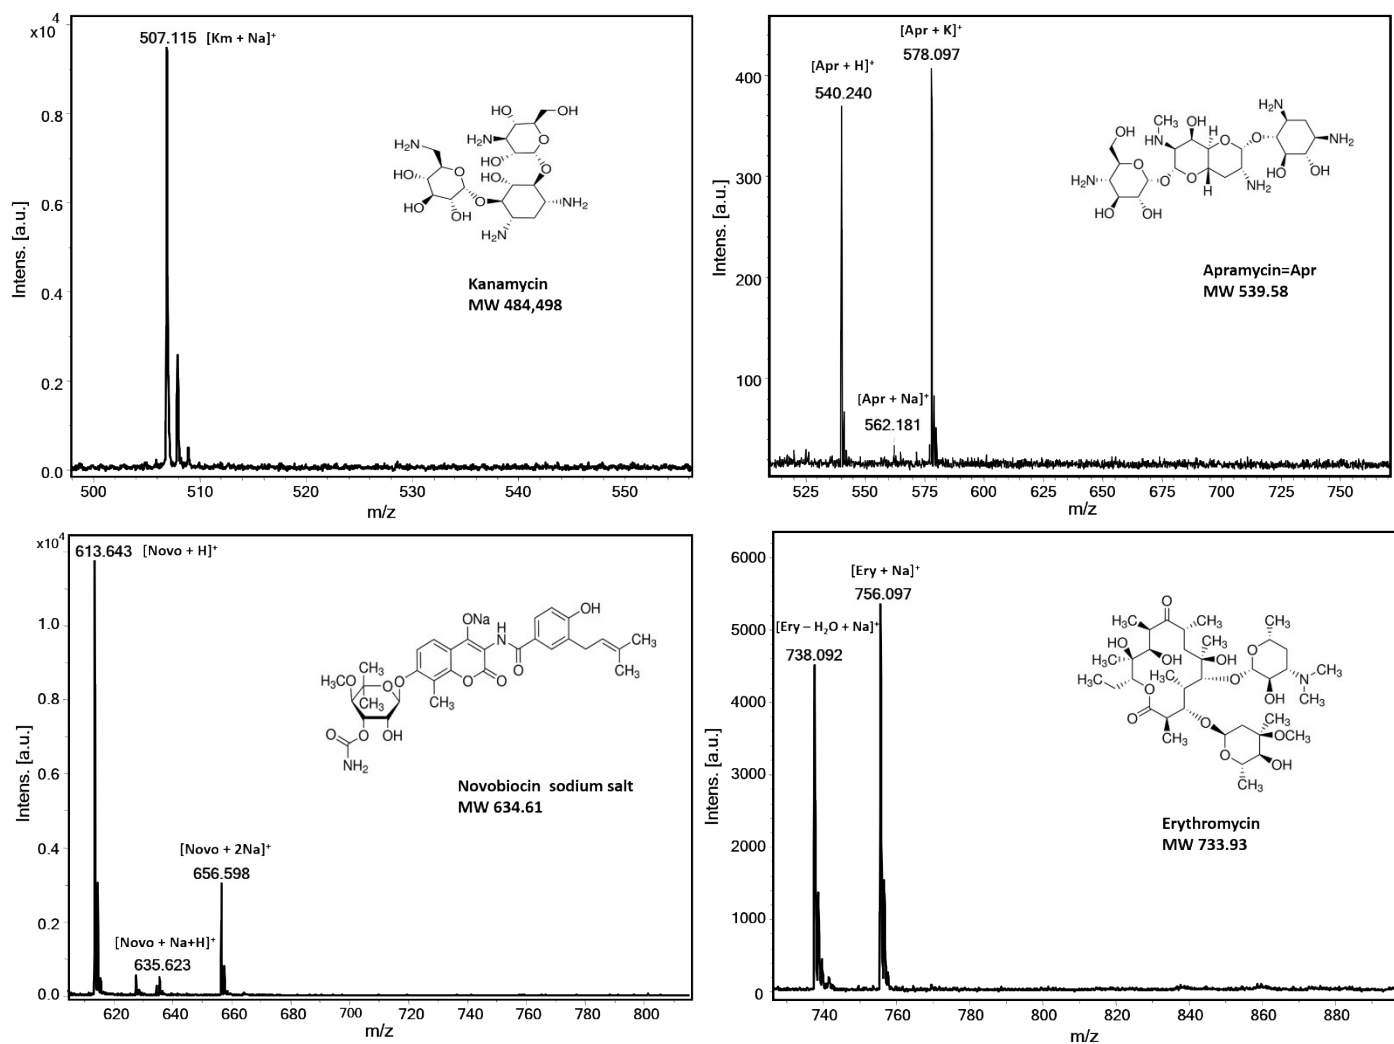

**Figure S16:** Mass spectra of four antibiotics: Kanamycin, Apramycin, Novobiocin, Erythromycin. The concentration was 100 µg/mL in 10 mM NaCl aqueous solution.

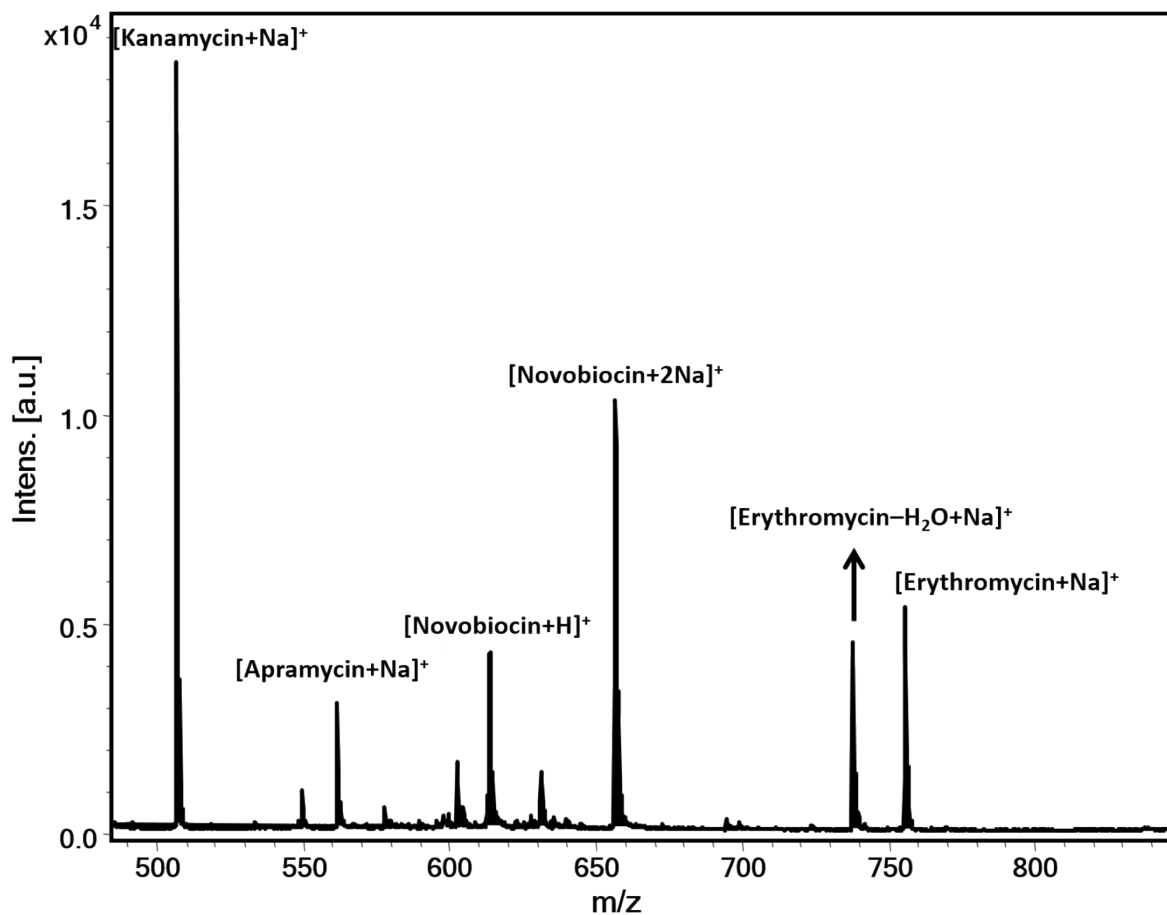

**Figure S17:** Mass spectrum obtained from the mixture of four antibiotics in positive ion mode. The concentration for each peptide was 100  $\mu\text{g/mL}$  in presence of 10 mM NaCl aqueous solution.

**Table S2:** S/N obtained from antibiotics solutions peptides solutions on N-SOI surface (Box 200 nm). Signal variation have been calculated from 3 spots/surface and from 3 different surfaces. Data shown as mean  $\pm$  SD,  $n = 6$ .

Table S2 : Signal to noise ratios obtained from antibiotics solution on N-SOI surface (Box 200 nm).

Signal variation have been calculated from 3 spots/surface and from 3 different surfaces. Data shown as mean  $\pm$  SD,  $n = 6$ .

| Antibiotics on N-SOI (Box 200 nm) | Cumulated S/N (SD%) | Ion                                                                | Detected in mixture |
|-----------------------------------|---------------------|--------------------------------------------------------------------|---------------------|
| Kanamycin                         | 300 (20%)           | $[M+\text{Na}]^+$                                                  | Yes                 |
| Apramycin                         | 80 (30%)            | $[M+\text{H}]^+$ , $[M+\text{Na}]^+$ , $[M+\text{K}]^+$            | Yes                 |
| Novobiocin                        | 900 (22%)           | $[M+\text{H}]^+$ , $[M+2\text{Na}]^+$ , $[M+\text{Na}+\text{H}]^+$ | Yes                 |
| Erythromycin                      | 250 (20%)           | $[M-\text{H}_2\text{O}+\text{Na}]^+$ , $[M+\text{Na}]^+$           | Yes                 |
